# Supplementary material for: Phylogeographic Substructuring in the Southernmost Refugium of the European Common Frog Rana temporaria
Source: MDPI journal article supplement (doi:10.3390/ani14101430), 2024-05-10
Supplement: s1 [file s1]

**Table S1.** A list of samples imported from GenBank, with IDs (GenBank accession numbers) for *16S rRNA* gene sequences.

|     | GenBank ID | Country of origin | Haplotype  |
|-----|------------|-------------------|------------|
| 1.  | KR136358   | Serbia            | <i>h2</i>  |
| 2.  | KR136359   | Serbia            | <i>h2</i>  |
| 3.  | KR136360   | Serbia            | <i>h2</i>  |
| 4.  | MH791124   | Serbia            | <i>h3</i>  |
| 5.  | MH791125   | Serbia            | <i>h5</i>  |
| 6.  | MH791126   | Serbia            | <i>h2</i>  |
| 7.  | MH791127   | Serbia            | <i>h5</i>  |
| 8.  | MH791128   | Serbia            | <i>h5</i>  |
| 9.  | MH791129   | Serbia            | <i>h5</i>  |
| 10. | MH791130   | Serbia            | <i>h2</i>  |
| 11. | MH791131   | Serbia            | <i>h2</i>  |
| 12. | MH791132   | Serbia            | <i>h2</i>  |
| 13. | MH791133   | Serbia            | <i>h2</i>  |
| 14. | MH791134   | Serbia            | <i>h2</i>  |
| 15. | MH791135   | Serbia            | <i>h2</i>  |
| 16. | MH791136   | Serbia            | <i>h3</i>  |
| 17. | MH791137   | Serbia            | <i>h3</i>  |
| 18. | MH791138   | Serbia            | <i>h3</i>  |
| 19. | MH791139   | Serbia            | <i>h19</i> |
| 20. | MK013973   | no data           | <i>h2</i>  |
| 21. | MH105087   | Denmark           | <i>h2</i>  |
| 22. | MH105086   | Denmark           | <i>h2</i>  |
| 23. | LC640540   | Russia            | <i>h2</i>  |
| 24. | KJ128957   | Sweeden           | <i>h2</i>  |
| 25. | KJ128956   | Sweeden           | <i>h2</i>  |
| 26. | KJ128955   | Sweeden           | <i>h2</i>  |
| 27. | KC977165   | Germany           | <i>h2</i>  |
| 28. | KC977163   | Germany           | <i>h2</i>  |
| 29. | KC977162   | Germany           | <i>h2</i>  |
| 30. | KC977158   | Ukraine           | <i>h2</i>  |
| 31. | AB058882   | Russia            | <i>h2</i>  |
| 32. | AB685766   | Czechoslovakia    | <i>h2</i>  |
| 33. | KX269196   | Ukraine           | <i>h2</i>  |
| 34. | KY762044   | Spain             | <i>h3</i>  |
| 35. | KC977170   | France            | <i>h3</i>  |
| 36. | JF299195   | Spain             | <i>h3</i>  |
| 37. | AY147952   | France            | <i>h3</i>  |
| 38. | MK511395   | no data           | <i>h1</i>  |
| 39. | KT074475   | Spain             | <i>h4</i>  |
| 40. | JF299199   | Spain             | <i>h4</i>  |
| 41. | KC977178   | Italy             | <i>h5</i>  |
| 42. | KC977177   | Croatia           | <i>h5</i>  |
| 43. | KC977176   | Spain             | <i>h6</i>  |
| 44. | KC977175   | Spain             | <i>h6</i>  |
| 45. | JF299203   | Spain             | <i>h6</i>  |
| 46. | KC977174   | Switzerland       | <i>h7</i>  |
| 47. | KC977166   | Ireland           | <i>h7</i>  |
| 48. | KC977167   | Ireland           | <i>h7</i>  |
| 49. | KC977164   | Germany           | <i>h7</i>  |
| 50. | KC977161   | Germany           | <i>h7</i>  |
| 51. | KC977160   | Germany           | <i>h7</i>  |
| 52. | KC977159   | Germany           | <i>h7</i>  |

|     |          |             |            |
|-----|----------|-------------|------------|
| 53. | JF299201 | Germany     | <i>h7</i>  |
| 54. | AF249048 | Belgium     | <i>h7</i>  |
| 55. | AY147954 | France      | <i>h7</i>  |
| 56. | AY326063 | no data     | <i>h7</i>  |
| 57. | DQ283129 | Germany     | <i>h7</i>  |
| 58. | DQ283128 | Ireland     | <i>h7</i>  |
| 59. | KC977173 | Spain       | <i>h8</i>  |
| 60. | JF299194 | Spain       | <i>h8</i>  |
| 61. | AF275742 | Spain       | <i>h8</i>  |
| 62. | AF275741 | Spain       | <i>h8</i>  |
| 63. | AF275740 | Spain       | <i>h8</i>  |
| 64. | AF275739 | Spain       | <i>h8</i>  |
| 65. | AF275738 | Spain       | <i>h8</i>  |
| 66. | AF275735 | Spain       | <i>h8</i>  |
| 67. | AY147951 | Spain       | <i>h8</i>  |
| 68. | KC977157 | Russia      | <i>h9</i>  |
| 69. | JF299206 | Spain       | <i>h10</i> |
| 70. | AY147955 | Spain       | <i>h10</i> |
| 71. | JF299205 | Spain       | <i>h11</i> |
| 72. | JF299204 | Spain       | <i>h12</i> |
| 73. | JF299197 | Spain       | <i>h13</i> |
| 74. | AY147953 | France      | <i>h13</i> |
| 75. | JF299196 | Spain       | <i>h14</i> |
| 76. | AF275737 | Spain       | <i>h15</i> |
| 77. | AF124135 | Germany     | <i>h16</i> |
| 78. | AY147956 | Germany     | <i>h17</i> |
| 79. | AY779191 | Switzerland | <i>h18</i> |

---

**Table S2.** A list of samples imported from GenBank, with IDs (GenBank accession numbers) for *MT-CYTB* gene sequences.

|     | GenBank ID | Country of origin | Haplotype |
|-----|------------|-------------------|-----------|
| 1.  | MT882526   | Greece            | <i>h1</i> |
| 2.  | MT882525   | Greece            | <i>h1</i> |
| 3.  | KC799833   | Greece            | <i>h1</i> |
| 4.  | KC800122   | Spain             | <i>h2</i> |
| 5.  | KC800121   | Spain             | <i>h2</i> |
| 6.  | KC800118   | Spain             | <i>h2</i> |
| 7.  | KC799859   | Italy             | <i>h2</i> |
| 8.  | KC799858   | Italy             | <i>h2</i> |
| 9.  | KT074851   | Spain             | <i>h2</i> |
| 10. | KC800120   | Spain             | <i>h3</i> |
| 11. | KC800119   | Spain             | <i>h3</i> |
| 12. | KT074850   | Spain             | <i>h3</i> |
| 13. | KT074849   | Spain             | <i>h3</i> |
| 14. | KT074848   | Spain             | <i>h3</i> |
| 15. | KC800108   | Germany           | <i>h4</i> |
| 16. | KC800107   | Germany           | <i>h4</i> |
| 17. | KC800106   | Germany           | <i>h4</i> |
| 18. | KC800102   | Switzerland       | <i>h4</i> |
| 19. | KC800101   | Switzerland       | <i>h4</i> |
| 20. | KC800026   | Ireland           | <i>h4</i> |
| 21. | KC800025   | Ireland           | <i>h4</i> |
| 22. | KC800024   | Ireland           | <i>h4</i> |
| 23. | KC800011   | Switzerland       | <i>h4</i> |
| 24. | KC800010   | Switzerland       | <i>h4</i> |
| 25. | KC800009   | Switzerland       | <i>h4</i> |
| 26. | AF249078   | Belgium           | <i>h4</i> |
| 27. | KC800105   | Germany           | <i>h5</i> |
| 28. | KC800100   | France            | <i>h5</i> |
| 29. | KC800099   | France            | <i>h5</i> |
| 30. | KC800083   | Rusia             | <i>h5</i> |
| 31. | KC800082   | Rusia             | <i>h5</i> |
| 32. | KC800081   | Rusia             | <i>h5</i> |
| 33. | KC800078   | Ukraine           | <i>h5</i> |
| 34. | KC800077   | Ukraine           | <i>h5</i> |
| 35. | KC800076   | Ukraine           | <i>h5</i> |
| 36. | KC800055   | Ukraine           | <i>h5</i> |
| 37. | KC800047   | Poland            | <i>h5</i> |
| 38. | KC800046   | Poland            | <i>h5</i> |
| 39. | KC800045   | Poland            | <i>h5</i> |
| 40. | KC800044   | Poland            | <i>h5</i> |
| 41. | KC800043   | Poland            | <i>h5</i> |
| 42. | KC800019   | Ukraine           | <i>h5</i> |
| 43. | KC799992   | Latvia            | <i>h5</i> |
| 44. | KC799930   | Rusia             | <i>h5</i> |
| 45. | KC799929   | Rusia             | <i>h5</i> |
| 46. | KC799914   | Finland           | <i>h5</i> |
| 47. | KC799913   | Finland           | <i>h5</i> |
| 48. | KC799912   | Finland           | <i>h5</i> |
| 49. | KC799911   | Finland           | <i>h5</i> |
| 50. | KC799910   | Finland           | <i>h5</i> |
| 51. | KC799909   | Finland           | <i>h5</i> |

|     |          |             |            |
|-----|----------|-------------|------------|
| 52. | KC799908 | Finland     | <i>h5</i>  |
| 53. | KC799850 | Hungary     | <i>h5</i>  |
| 54. | KC799823 | Ukraine     | <i>h5</i>  |
| 55. | KC800104 | Germany     | <i>h6</i>  |
| 56. | KC800022 | Ireland     | <i>h6</i>  |
| 57. | KC800021 | Ireland     | <i>h6</i>  |
| 58. | KC800020 | Ireland     | <i>h6</i>  |
| 59. | KC800104 | Germany     | <i>h6</i>  |
| 60. | KC800098 | France      | <i>h7</i>  |
| 61. | KC800097 | France      | <i>h7</i>  |
| 62. | KC800096 | France      | <i>h7</i>  |
| 63. | KC800095 | France      | <i>h7</i>  |
| 64. | KC800094 | France      | <i>h7</i>  |
| 65. | KC800080 | France      | <i>h7</i>  |
| 66. | KC800023 | Ireland     | <i>h8</i>  |
| 67. | KC799834 | Greece      | <i>h9</i>  |
| 68. | KC799822 | Croatia     | <i>h10</i> |
| 69. | KC799821 | Croatia     | <i>h10</i> |
| 70. | KC799820 | Croatia     | <i>h10</i> |
| 71. | KC799819 | Croatia     | <i>h10</i> |
| 72. | KC799817 | Croatia     | <i>h10</i> |
| 73. | KC799818 | Croatia     | <i>h11</i> |
| 74. | KC799801 | Italy       | <i>h12</i> |
| 75. | KC799800 | Italy       | <i>h12</i> |
| 76. | KC799799 | Italy       | <i>h12</i> |
| 77. | MF624355 | Switzerland | <i>h13</i> |
| 78. | MF624354 | Switzerland | <i>h14</i> |
| 79. | MF624353 | Switzerland | <i>h15</i> |
| 80. | MF624352 | Switzerland | <i>h16</i> |
| 81. | MF624351 | Switzerland | <i>h17</i> |
| 82. | KY762154 | Spain       | <i>h18</i> |
| 83. | KT074852 | Spain       | <i>h19</i> |
| 84. | KT074790 | Italy       | <i>h20</i> |
| 85. | KT074788 | Italy       | <i>h20</i> |
| 86. | KT074789 | Italy       | <i>h21</i> |

---
